# Supplementary material for: In situ ozone production is highly sensitive to volatile organic compounds in Delhi, India
Source: Copernicus journal article supplement (doi:10.5194/acp-21-13609-2021), 2021-09-13
Supplement: Supplementary file 1 [file acp-21-13609-2021-supplement.pdf]

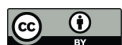

*Supplement of*

## **In situ ozone production is highly sensitive to volatile organic compounds in Delhi, India**

**Beth S. Nelson et al.**

*Correspondence to:* Beth S. Nelson ([bsn502@york.ac.uk](mailto:bsn502@york.ac.uk)) and James D. Lee ([james.lee@york.ac.uk](mailto:james.lee@york.ac.uk))

The copyright of individual parts of the supplement might differ from the article licence.

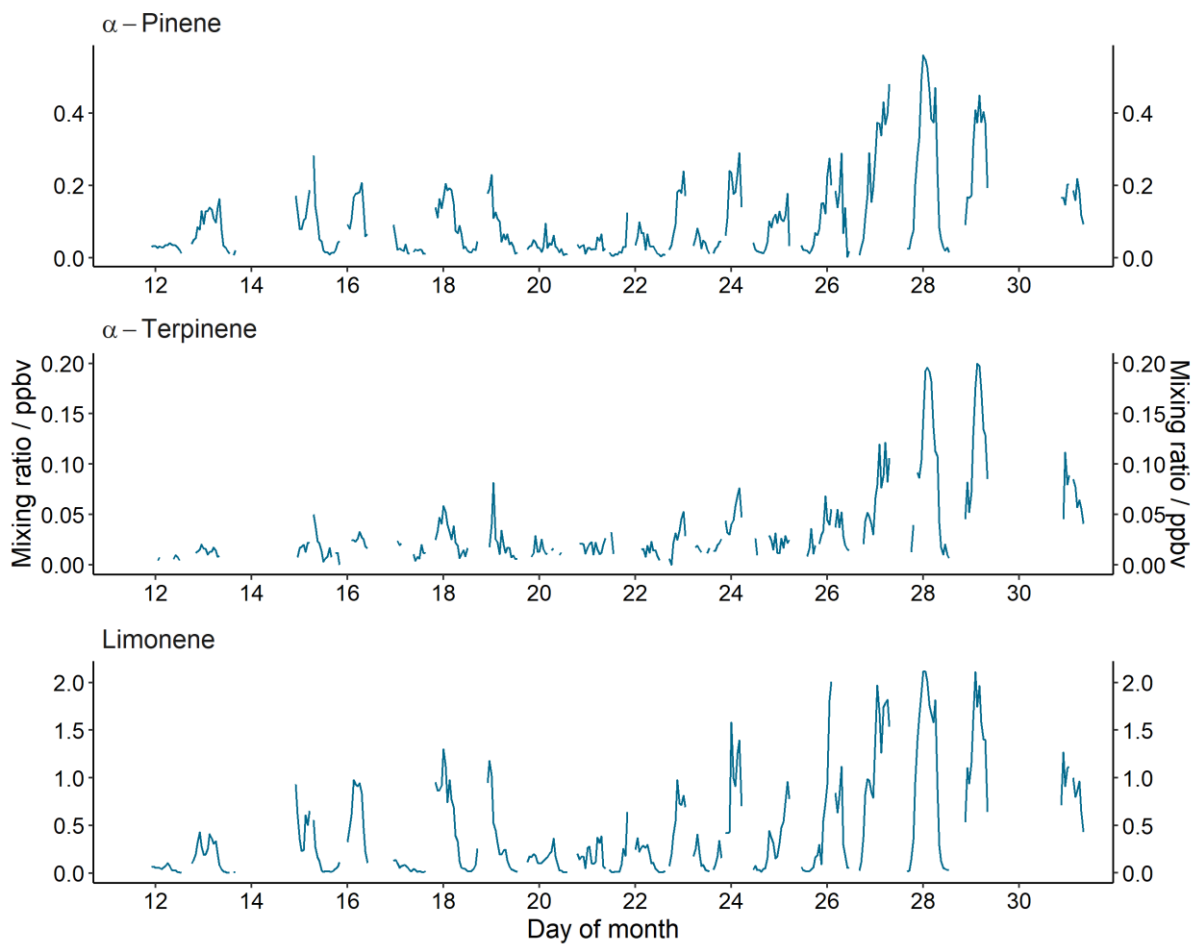

**Figure S1:** Selected timeseries for monoterpenes measured during October, 2018 at Indira Gandhi Delhi Technical University for Women. Top to bottom:  $\alpha$ -pinene,  $\alpha$ -terpinene, limonene.

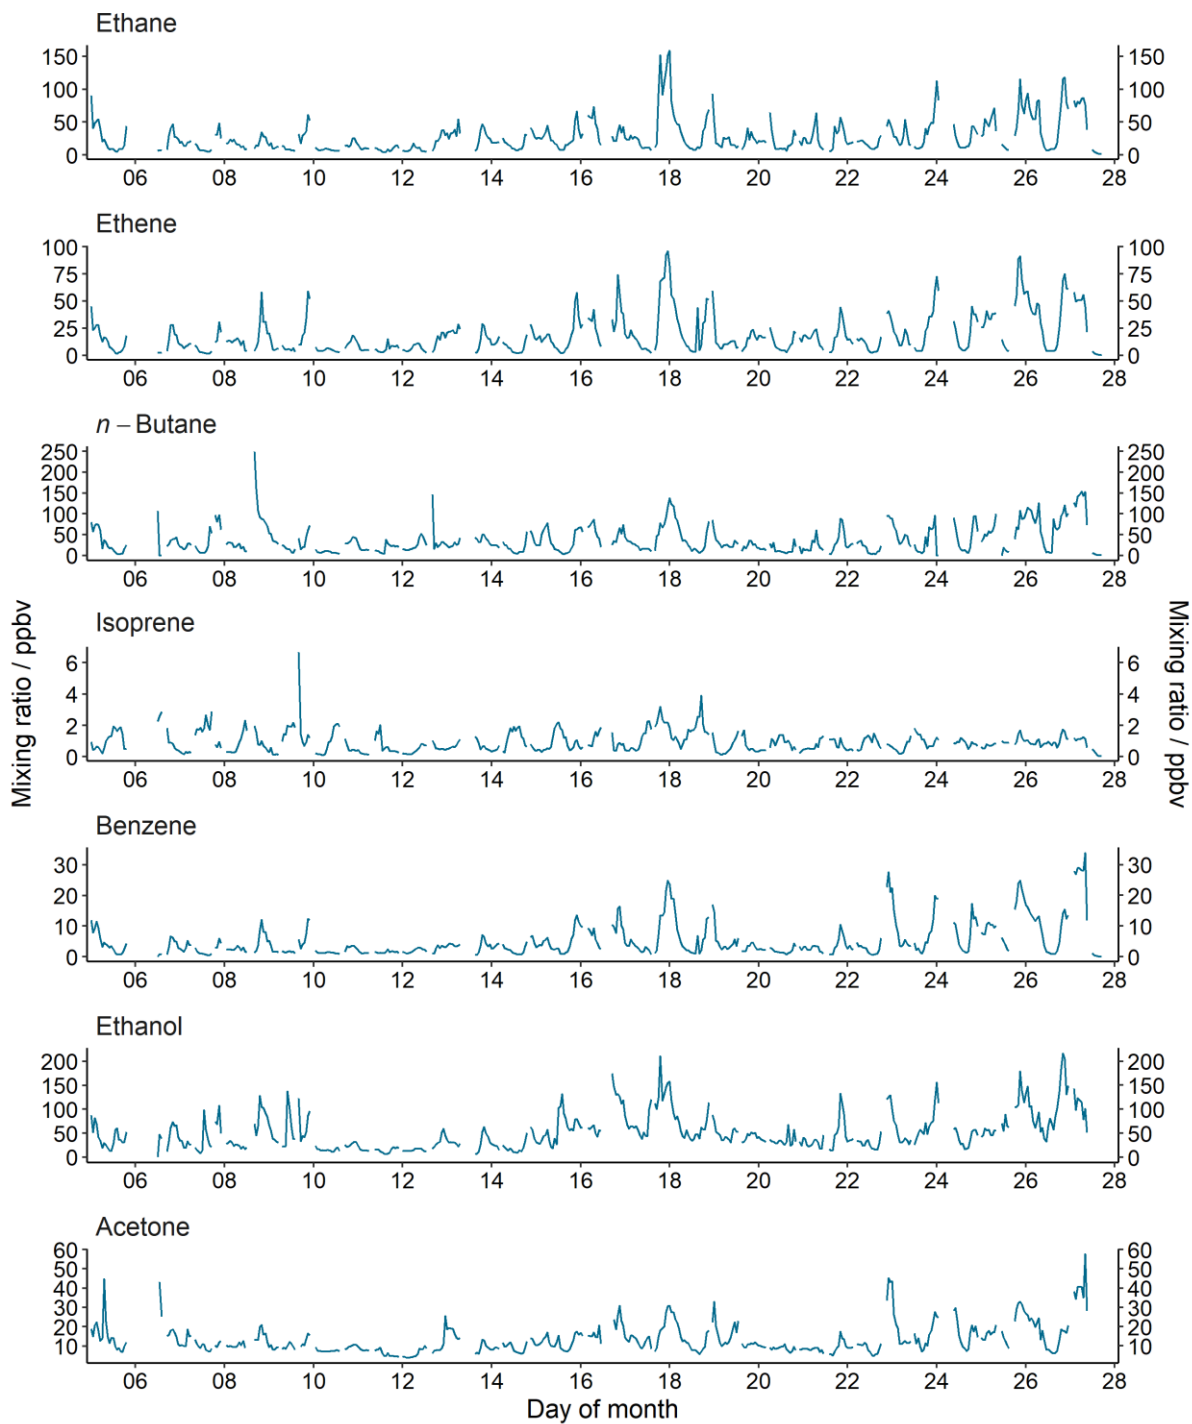

5 **Figure S2:** Selected timeseries for VOCs measured during October, 2018 at Indira Gandhi Delhi Technical University for Women. Top to bottom: ethane, ethene, *n*-butane, isoprene, benzene, ethanol, acetone.

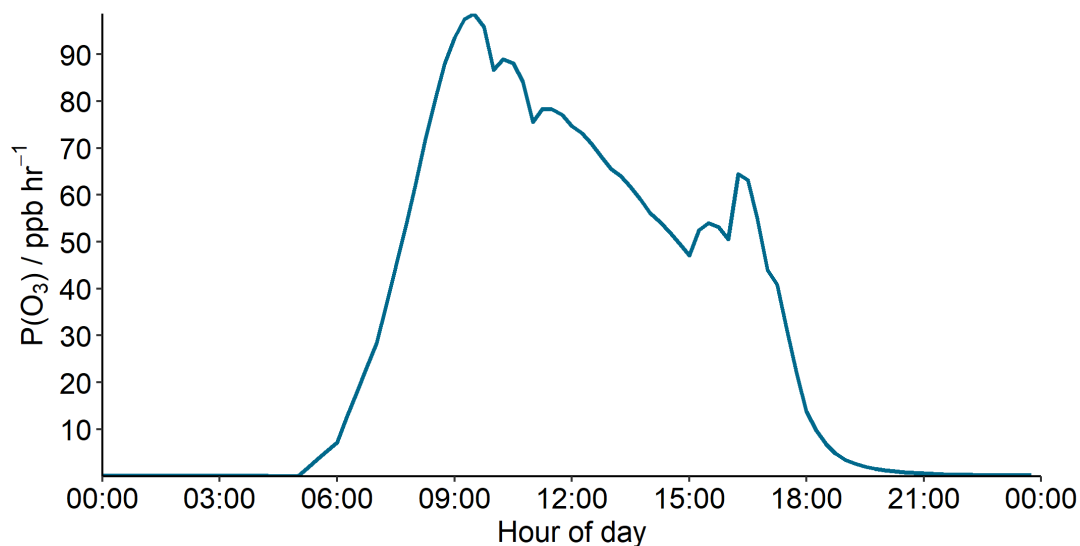

**Figure S3:** Diel profile of campaign averaged modelled ozone production,  $P(O_3)$ .

- 10 **Table S1:** List of VOCs included in model, along with campaign averaged mixing ratios and proxy mechanisms for species not found in the master chemical mechanism (MCM). Rate constants for additional species to those in the MCM can be found on the IUPAC Task Group on Atmospheric Chemical Kinetic Data Evaluation database (<http://iupac.pole-ether.fr/>, last access: August 2018), originally published in Atkinson et al., 2006, or in Atkinson and Arey, 2003.

| Species            | Class   | Campaign Average<br>Mixing Ratios / ppbv |       |       | Proxy Mechanism used<br>for species not in the<br>MCM | Instrument  |
|--------------------|---------|------------------------------------------|-------|-------|-------------------------------------------------------|-------------|
|                    |         | Mean                                     | Min.  | Max.  |                                                       |             |
| Ethanol            | Alcohol | 50.98                                    | 29.69 | 92    | -                                                     | (DC)-GC-FID |
| Methanol           |         | 49.87                                    | 21.1  | 81.71 | -                                                     | (DC)-GC-FID |
| Ethane             | Alkane  | 27.09                                    | 7.09  | 51.63 | -                                                     | (DC)-GC-FID |
| Isobutane          |         | 19.89                                    | 5.96  | 34.95 | -                                                     | (DC)-GC-FID |
| Isopentane         |         | 15.86                                    | 3.97  | 36    | -                                                     | (DC)-GC-FID |
| <i>n</i> -Butane   |         | 37.21                                    | 6.7   | 69.21 | -                                                     | (DC)-GC-FID |
| <i>n</i> -Decane   |         | 1.07                                     | 0.2   | 1.99  | -                                                     | GC × GC-FID |
| <i>n</i> -Dodecane |         | 1.09                                     | 0.16  | 1.87  | -                                                     | GC × GC-FID |
| <i>n</i> -Heptane  |         | 1.18                                     | 0.2   | 2.93  | -                                                     | (DC)-GC-FID |
| <i>n</i> -Hexane   |         | 1.63                                     | 0.3   | 3.69  | -                                                     | (DC)-GC-FID |

|                             |          |       |      |       |                             |             |
|-----------------------------|----------|-------|------|-------|-----------------------------|-------------|
| <i>n</i> -Nonane            |          | 1.35  | 0.24 | 2.67  | -                           | GC × GC-FID |
| <i>n</i> -Octane            |          | 0.54  | 0.09 | 1.33  | -                           | (DC)-GC-FID |
| <i>n</i> -Pentane           |          | 6.05  | 1.4  | 13.48 | -                           | (DC)-GC-FID |
| <i>n</i> -Tetradecane       |          | 1.42  | 0.41 | 2.28  | <i>n</i> -Dodecane          | GC × GC-FID |
| <i>n</i> -Tridecane         |          | 2.93  | 0.52 | 4.67  | <i>n</i> -Dodecane          | GC × GC-FID |
| <i>n</i> -Undecane          |          | 0.54  | 0.09 | 0.95  | -                           | GC × GC-FID |
| Propane                     |          | 39.12 | 9.84 | 68.95 | -                           | (DC)-GC-FID |
| 1,2-Butadiene               | Alkene   | 0.28  | 0.07 | 0.45  | 1,3-Butadiene               | (DC)-GC-FID |
| 1,3-Butadiene               |          | 0.7   | 0.07 | 1.65  | -                           | (DC)-GC-FID |
| But-1-ene                   |          | 1.47  | 0.21 | 3.02  | -                           | (DC)-GC-FID |
| <i>cis</i> -But-2-ene       |          | 1.03  | 0.2  | 2.19  | -                           | (DC)-GC-FID |
| Ethene                      |          | 18.34 | 3.14 | 39.82 | -                           | (DC)-GC-FID |
| Isopropene                  |          | 2.22  | 0.32 | 4.65  | -                           | (DC)-GC-FID |
| Pent-1-ene                  |          | 0.34  | 0.06 | 0.77  | -                           | (DC)-GC-FID |
| Propene                     |          | 5.26  | 0.64 | 11.3  | -                           | (DC)-GC-FID |
| <i>trans</i> -But-2-ene     |          | 1.07  | 0.16 | 2.36  | -                           | (DC)-GC-FID |
| <i>trans</i> -Pent-2-ene    |          | 0.53  | 0.09 | 1.4   | -                           | (DC)-GC-FID |
| Acetylene                   | Alkyne   | 8.91  | 2.16 | 20.2  | -                           | (DC)-GC-FID |
| Propyne                     |          | 0.38  | 0.09 | 0.82  | Acetylene                   | (DC)-GC-FID |
| 1,2,3,4-Tetramethylbenzene  | Aromatic | 0.21  | 0.01 | 0.5   | 1,2,3-Trimethylbenzene      | GC × GC-FID |
| 1,2,3,5-Tetramethylbenzene  |          | 0.28  | 0.02 | 0.64  | 1,2,3-Trimethylbenzene      | GC × GC-FID |
| 1,2,3-Trimethylbenzene      |          | 0.64  | 0.06 | 1.48  | -                           | GC × GC-FID |
| 1,2,4,5-Tetramethylbenzene  |          | 0.16  | 0.02 | 0.32  | 1,2,4-Trimethylbenzene      | GC × GC-FID |
| 1,2,4-Trimethylbenzene      |          | 1.86  | 0.2  | 4.3   | -                           | GC × GC-FID |
| 1,2-Diethylbenzene          |          | 0.18  | 0.02 | 0.39  | <i>o</i> -Ethyltoluene      | GC × GC-FID |
| 1,2-Dimethyl-4-ethylbenzene |          | 0.35  | 0.02 | 0.84  | 3,5-Dimethyl-1-ethylbenzene | GC × GC-FID |
| 1,3,5-Trimethylbenzene      |          | 0.61  | 0.05 | 1.41  | -                           | GC × GC-FID |
| 1,3-Diethyl-2-ethylbenzene  |          | 0.1   | 0.02 | 0.21  | 3,5-Dimethyl-1-ethylbenzene | GC × GC-FID |
| 1,3-Diethylbenzene          |          | 0.2   | 0.02 | 0.44  | <i>m</i> -Ethyltoluene      | GC × GC-FID |
| 1,4-Diethylbenzene          |          | 0.51  | 0.04 | 1.20  | <i>p</i> -Ethyltoluene      | GC × GC-FID |
| 1-Methyl-3-propylbenzene    |          | 0.10  | 0.01 | 0.21  | Propylbenzene               | GC × GC-FID |

|                             |             |       |      |       |                             |              |
|-----------------------------|-------------|-------|------|-------|-----------------------------|--------------|
| 1-Methyl-4-propylbenzene    |             | 0.14  | 0.01 | 0.33  | Propylbenzene               | GC × GC-FID  |
| 1-Methylpropylbenzene       |             | 0.17  | 0.02 | 0.36  | Propylbenzene               | GC × GC-FID  |
| 2,3-Dimethyl-1-ethylbenzene |             | 0.09  | 0.01 | 0.22  | 3,5-Dimethyl-1-ethylbenzene | GC × GC-FID  |
| 2,4-Dimethyl-1-ethylbenzene |             | 0.17  | 0.02 | 0.4   | 3,5-Dimethyl-1-ethylbenzene | GC × GC-FID  |
| 2-Methylpropylbenzene       |             | 0.16  | 0.02 | 0.36  | Propylbenzene               | GC × GC-FID  |
| Benzene                     |             | 5.26  | 1.15 | 10.05 | -                           | (DC)-GC-FID  |
| Ethylbenzene                |             | 2.09  | 0.36 | 4.88  | -                           | (DC)-GC-FID  |
| Isopropylbenzene            |             | 0.29  | 0.03 | 0.72  | -                           | GC × GC-FID  |
| <i>m</i> -Xylene            |             | 2.19  | 0.32 | 6.02  | -                           | (DC)-GC-FID  |
| <i>n</i> -Butylbenzene      |             | 0.51  | 0.04 | 1.2   | Propylbenzene               | GC × GC-FID  |
| <i>o</i> -Ethyltoluene      |             | 0.65  | 0.08 | 1.47  | -                           | GC × GC-FID  |
| <i>o</i> -Xylene            |             | 1.85  | 0.3  | 4.86  | -                           | (DC)-GC-FID  |
| <i>p</i> -Ethyltoluene      |             | 1.78  | 0.27 | 4.13  | -                           | GC × GC-FID  |
| Propylbenzene               |             | 0.39  | 0.06 | 0.87  | -                           | GC × GC-FID  |
| <i>p</i> -Xylene            |             | 2.19  | 0.32 | 6.02  | -                           | (DC)-GC-FID  |
| Styrene                     |             | 0.9   | 0.06 | 1.69  | -                           | GC × GC-FID  |
| Toluene                     |             | 14.09 | 2.62 | 30.09 | -                           | (DC)-GC-FID  |
| Acetaldehyde                | Carbonyl    | 8.3   | 2.93 | 11.89 | -                           | PTR-QiTOF-MS |
| Acetone                     |             | 13.24 | 7.44 | 18.64 | -                           | (DC)-GC-FID  |
| Cyclohexane                 |             | 0.35  | 0.12 | 0.55  | -                           | PTR-QiTOF-MS |
| Ethylacetate                |             | 8.48  | 2.04 | 14.14 | -                           | GC × GC-FID  |
| Formaldehyde                |             | 14.29 | 8.69 | 18.25 | -                           | PTR-QiTOF-MS |
| Hexan-2-one                 |             | 0.48  | 0.15 | 0.67  | -                           | PTR-QiTOF-MS |
| Hexan-3-one                 |             | 0.48  | 0.15 | 0.67  | -                           | PTR-QiTOF-MS |
| Methacrolein                |             | 1.01  | 0.49 | 1.46  | -                           | PTR-QiTOF-MS |
| Methyl isobutyl ketone      |             | 0.48  | 0.15 | 0.67  | -                           | PTR-QiTOF-MS |
| Methyl propyl ketone        |             | 1.64  | 0.73 | 2.28  | -                           | PTR-QiTOF-MS |
| Methyl vinyl ketone         |             | 3.59  | 1.2  | 5.29  | -                           | PTR-QiTOF-MS |
| Isoprene                    | Isoprene    | 0.94  | 0.44 | 1.57  | -                           | (DC)-GC-FID  |
| $\alpha$ -Phellandrene      | Monoterpene | 0.09  | 0.02 | 0.15  | $\alpha$ -Pinene            | GC × GC-FID  |
| 3-Carene                    |             | 0.08  | 0.02 | 0.15  | $\alpha$ -Pinene            | GC × GC-FID  |

|                     |  |      |      |      |                        |                    |
|---------------------|--|------|------|------|------------------------|--------------------|
| Camphene            |  | 0.09 | 0.01 | 0.16 | $\beta$ -Pinene        | GC $\times$ GC-FID |
| Limonene            |  | 0.38 | 0.02 | 0.79 | -                      | GC $\times$ GC-FID |
| <i>m</i> -Cymene    |  | 0.53 | 0.04 | 1.03 | <i>m</i> -Ethyltoluene | GC $\times$ GC-FID |
| Myrcene             |  | 0.08 | 0.01 | 0.14 | Limonene               | GC $\times$ GC-FID |
| <i>o</i> -Cymene    |  | 0.06 | 0.01 | 0.11 | <i>o</i> -Ethyltoluene | GC $\times$ GC-FID |
| <i>p</i> -Cymene    |  | 0.53 | 0.04 | 1.03 | <i>p</i> -Ethyltoluene | GC $\times$ GC-FID |
| Sabinene            |  | 0.06 | 0.02 | 0.13 | $\beta$ -Pinene        | GC $\times$ GC-FID |
| Terpinolene         |  | 0.07 | 0    | 0.15 | $\beta$ -Pinene        | GC $\times$ GC-FID |
| $\alpha$ -Pinene    |  | 0.09 | 0.01 | 0.18 | -                      | GC $\times$ GC-FID |
| $\alpha$ -Terpinene |  | 0.03 | 0.01 | 0.06 | $\alpha$ -Pinene       | GC $\times$ GC-FID |
| $\beta$ -Ocimene    |  | 0.31 | 0.02 | 0.67 | Limonene               | GC $\times$ GC-FID |
| $\beta$ -Pinene     |  | 0.05 | 0.01 | 0.09 | -                      | GC $\times$ GC-FID |
| $\gamma$ -terpinene |  | 0.05 | 0.01 | 0.1  | $\alpha$ -Pinene       | GC $\times$ GC-FID |

15

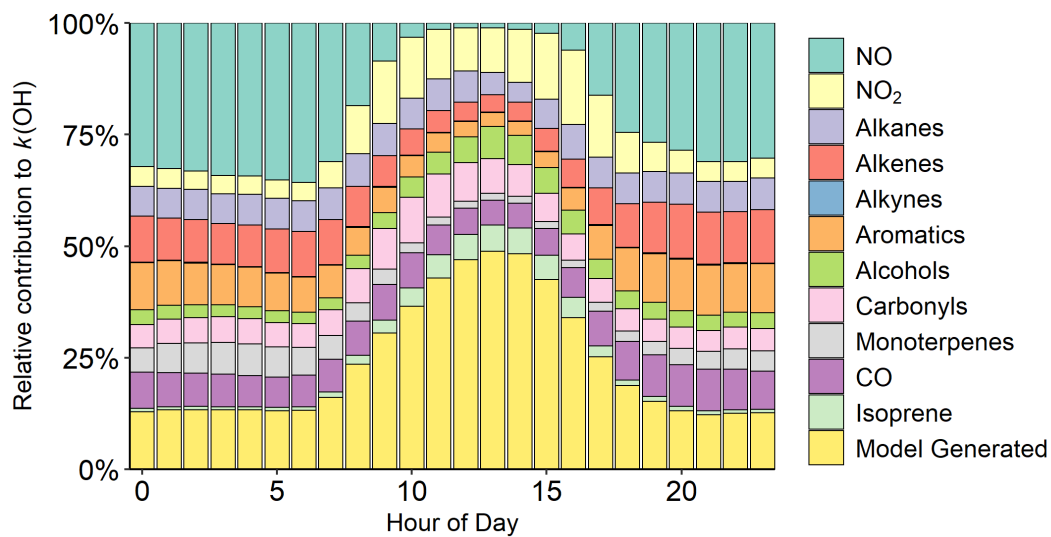

**Figure S3:** Relative contributions of NO, NO<sub>2</sub>, CO, VOC classes and model generated species to  $k(\text{OH})$  per hour.

20

25 **Table S2:**  $\Delta P(O_3)_{\text{increment}}$  for 77 VOCs, averaged between 08:00 and 12:00. The 10 highest values are shown in **bold**.

| Species                     | $\Delta P(O_3)_{\text{increment}} / \text{ppb hr}^{-1}$ |
|-----------------------------|---------------------------------------------------------|
| $\alpha$ -Phellandrene      | <b>0.30</b>                                             |
| $\alpha$ -Pinene            | 0.02                                                    |
| $\alpha$ -Terpinene         | <b>0.66</b>                                             |
| 1,2-Butadiene               | 0.02                                                    |
| Benzene                     | 0.02                                                    |
| $\beta$ -Ocimene            | <b>0.26</b>                                             |
| $\beta$ -Pinene             | 0.00                                                    |
| But-1-ene                   | 0.12                                                    |
| Ethyne                      | 0.00                                                    |
| Ethene                      | <b>0.40</b>                                             |
| Ethanol                     | <b>0.30</b>                                             |
| Ethane                      | 0.01                                                    |
| Propyne                     | 0.00                                                    |
| Propene                     | <b>0.35</b>                                             |
| Propane                     | 0.07                                                    |
| 1,3-Butadiene               | 0.07                                                    |
| Isoprene                    | <b>0.94</b>                                             |
| 3-Carene                    | 0.03                                                    |
| <i>Cis</i> -But-2-ene       | 0.19                                                    |
| Methanol                    | 0.08                                                    |
| Camphene                    | 0.01                                                    |
| CO                          | <b>0.28</b>                                             |
| 1,2-Diethylbenzene          | 0.01                                                    |
| 1,3-Diethylbenzene          | 0.02                                                    |
| 1,4-Diethylbenzene          | 0.02                                                    |
| 1,2-Dimethyl-4-ethylbenzene | 0.06                                                    |
| 1,3-Dimethyl-2-ethylbenzene | 0.03                                                    |
| 2,3-Dimethyl-1-ethylbenzene | 0.02                                                    |
| 2,4-Dimethyl-1-ethylbenzene | 0.03                                                    |
| Ethylbenzene                | 0.06                                                    |



|                          |      |
|--------------------------|------|
| $\gamma$ -Terpinene      | 0.03 |
| Hex-2-one                | 0.00 |
| Hex-3-one                | 0.00 |
| Isobutane                | 0.15 |
| Isopentane               | 0.14 |
| Isopropylbenzene         | 0.01 |
| Limonene                 | 0.09 |
| <i>m</i> -Cymene         | 0.03 |
| 1-Methyl-3-propylbenzene | 0.00 |
| 1-Methyl-4-propylbenzene | 0.00 |
| 1-Methylpropylbenzene    | 0.00 |
| 2-Methylpropylbenzene    | 0.00 |
| Methylpropene            | 0.23 |
| <i>m</i> -Xylene         | 0.21 |
| Myrcene                  | 0.08 |
| <i>n</i> -Butylbenzene   | 0.02 |
| <i>n</i> -Decane         | 0.01 |
| <i>n</i> -Undecane       | 0.00 |
| <i>n</i> -Dodecane       | 0.01 |
| <i>n</i> -Tridecane      | 0.05 |
| <i>n</i> -Tetradecane    | 0.04 |
| <i>n</i> -Butane         | 0.21 |
| <i>n</i> -Pentane        | 0.07 |
| <i>n</i> -Hexane         | 0.01 |
| <i>n</i> -Heptane        | 0.01 |
| <i>n</i> -Octane         | 0.00 |
| <i>n</i> -Nonane         | 0.01 |
| <i>o</i> -Cymene         | 0.00 |
| <i>o</i> -Ethyltoluene   | 0.04 |
| <i>o</i> -Xylene         | 0.14 |
| Propylbenzene            | 0.01 |
| <i>p</i> -Cymene         | 0.02 |
| Pent-1-ene               | 0.03 |

|                            |             |
|----------------------------|-------------|
| <i>p</i> -Ethyltoluene     | 0.08        |
| <i>p</i> -Xylene           | 0.13        |
| Sabinene                   | 0.01        |
| Styrene                    | 0.01        |
| <i>trans</i> -But-2-ene    | 0.22        |
| 1,2,3,4-Tetramethylbenzene | 0.04        |
| 1,2,3,5-Tetramethylbenzene | 0.06        |
| 1,2,4,5-Tetramethylbenzene | 0.04        |
| 1,2,3-Trimethylbenzene     | 0.09        |
| 1,2,4-Trimethylbenzene     | <b>0.29</b> |
| 1,3,5-Trimethylbenzene     | 0.12        |
| Toluene                    | <b>0.37</b> |
| <i>trans</i> -Pent-2-ene   | 0.11        |
| Terpinolene                | 0.03        |

---

**Table S3:** Description of source sectors using in section 3.8. IPCC 1996 codes and descriptions taken from IPCC, 1996.

| Source              | IPCC code (1996) |      | Description                                                                                                                                                                                                                                                                                 |
|---------------------|------------------|------|---------------------------------------------------------------------------------------------------------------------------------------------------------------------------------------------------------------------------------------------------------------------------------------------|
| Road Transport (RT) | 1A3b             | 1A3b | All combustion and evaporative emissions from fuel use in road vehicles, including agricultural vehicles on highways.                                                                                                                                                                       |
|                     |                  | i    | Cars: automobiles designed primary for transport of persons, with a capacity of 12 or fewer. Gross vehicle weight rating of 3900 kg or less. Includes passenger vehicles with and without 3-way catalysts.                                                                                  |
|                     |                  | ii   | Light duty trucks: Vehicles with a gross vehicle weight of 3900 kg or less, designed primarily for the transportation of light-weight cargo or equipped with special features such as four-wheel drive for off-road operation. Includes light duty trucks with and without 3-way catalysts. |
|                     |                  | iii  | Heavy Duty trucks and buses: Any vehicle rated at more than 3900 kg gross vehicle weight or designed to carry more than 12 persons at a time.                                                                                                                                               |

|                                                    |           |      |                                                                                                                                                                                                                                                         |
|----------------------------------------------------|-----------|------|---------------------------------------------------------------------------------------------------------------------------------------------------------------------------------------------------------------------------------------------------------|
|                                                    |           | iv   | Motorcycles: Any motor vehicle designed to travel with not more than three wheels in contact with the ground, and weighing less than 680 kg.                                                                                                            |
|                                                    |           | v    | Evaporative emissions from vehicles.                                                                                                                                                                                                                    |
| Railways, Pipelines and Off-Road Transport (RPORT) | 1A3c+1A3e | 1A3c | Fuel combustion emissions from railways, including both freight and passenger traffic routes.                                                                                                                                                           |
|                                                    |           | 1A3e | Combustion emissions from all remaining transport activities including pipeline transportation, ground activities in airports and harbours, and off-road activities not reported under agriculture or manufacturing industries and construction.        |
| Energy for Buildings (EB)                          | 1A4       | 1A4a | Emissions from fuel combustion in commercial and institutional buildings.                                                                                                                                                                               |
|                                                    |           | 1A4b | All emissions from residential fuel combustion in households.                                                                                                                                                                                           |
|                                                    |           | 1A4c | Emissions from fuel combustion in agriculture, forestry or domestic inland coastal and deep-sea fishing. Includes traction vehicles, pump fuel use, grain drying, horticultural greenhouse and other agriculture, forestry or fishing related fuel use. |
| Combustion for Manufacturing (CM)                  | 1A2       | 1A2  | Emissions from combustion of fuels in industry including combustion for the generation of electricity and heat.                                                                                                                                         |
|                                                    |           | 1A2a | Iron and steel.                                                                                                                                                                                                                                         |
|                                                    |           | 1A2b | Non-ferrous metals.                                                                                                                                                                                                                                     |
|                                                    |           | 1A2c | Chemicals.                                                                                                                                                                                                                                              |
|                                                    |           | 1A2d | Pulp, paper and print.                                                                                                                                                                                                                                  |
|                                                    |           | 1A2e | Food processing, beverages and tobacco.                                                                                                                                                                                                                 |
|                                                    |           | 1A2f | Other emissions from fuel combustion in industry, including from the construction branch.                                                                                                                                                               |
| Process emissions (PE)                             | 2         | 2A   | Emissions from industrial processes: mineral products.                                                                                                                                                                                                  |
|                                                    |           | 2A1  | Cement production.                                                                                                                                                                                                                                      |
|                                                    |           | 2A2  | Lime production.                                                                                                                                                                                                                                        |
|                                                    |           | 2A3  | Limestone and dolomite use.                                                                                                                                                                                                                             |
|                                                    |           | 2A4  | Soda ash production and use.                                                                                                                                                                                                                            |
|                                                    |           | 2A5  | Asphalt roofing.                                                                                                                                                                                                                                        |
|                                                    |           | 2A6  | Road paving with asphalt.                                                                                                                                                                                                                               |

|  |     |                                                                                                                                                        |
|--|-----|--------------------------------------------------------------------------------------------------------------------------------------------------------|
|  | 2A7 | Other.                                                                                                                                                 |
|  | 2B  | Emissions from chemical industry.                                                                                                                      |
|  | 2B1 | Ammonia production.                                                                                                                                    |
|  | 2B2 | Nitric acid production.                                                                                                                                |
|  | 2B3 | Adipic acid production.                                                                                                                                |
|  | 2B4 | Carbide production.                                                                                                                                    |
|  | 2B5 | Other.                                                                                                                                                 |
|  | 2C  | Emissions from metal production industry.                                                                                                              |
|  | 2C1 | Iron and steel production.                                                                                                                             |
|  | 2C2 | Ferrous alloys production.                                                                                                                             |
|  | 2C3 | Aluminium production.                                                                                                                                  |
|  | 2C4 | SF <sub>6</sub> used in aluminium and magnesium foundries.                                                                                             |
|  | 2C5 | Other.                                                                                                                                                 |
|  | 2D  | Emissions from other production industries.                                                                                                            |
|  | 2D1 | Pulp and paper.                                                                                                                                        |
|  | 2D2 | Food and drink.                                                                                                                                        |
|  | 2E  | Production of halocarbons and sulfur hexafluoride.                                                                                                     |
|  | 2E1 | By-product emissions.                                                                                                                                  |
|  | 2E2 | Fugitive emissions.                                                                                                                                    |
|  | 2E3 | Other.                                                                                                                                                 |
|  | 2F  | Consumption of halocarbons and sulfur hexafluoride.                                                                                                    |
|  | 2F1 | Refrigeration and air conditioning equipment.                                                                                                          |
|  | 2F2 | Foam blowing.                                                                                                                                          |
|  | 2F3 | Fire extinguishers.                                                                                                                                    |
|  | 2F4 | Aerosols.                                                                                                                                              |
|  | 2F5 | Solvents.                                                                                                                                              |
|  | 2F5 | Other.                                                                                                                                                 |
|  | 2G  | Other emissions from industrial processes.                                                                                                             |
|  | 3   | Solvent and other product use. This category mainly covers volatile organic compound (VOC) emissions from solvents and other products containing VOCs. |
|  | 3A  | Paint application.                                                                                                                                     |

|  |  |    |                                                                                            |
|--|--|----|--------------------------------------------------------------------------------------------|
|  |  | 3B | Degreasing and dry cleaning.                                                               |
|  |  | 3C | Chemical products, manufacturing and processing.                                           |
|  |  | 3D | Other, including the use of N <sub>2</sub> O as a carrier gas, anaesthetic and propellant. |

## References

- 30 Atkinson, R. and Arey, J.: Atmospheric Degradation of Volatile Organic Compounds Atmospheric Degradation of Volatile Organic Compounds, Chem. Rev., 103(3), 4605–4638, doi:10.1021/cr0206420, 2003.

IPCC: Common Reporting Framework, [online] Available from: <https://www.ipcc-nggip.iges.or.jp/public/gl/guidelin/ch1ri.pdf>, 1996.

- 35 Atkinson, R., Baulch, D. L., Cox, R. A., Crowley, J. N., Hampson, R. F., Hynes, R. G., Jenkin, M. E., Rossi, M. J., Troe, J., and IUPAC Subcommittee: Evaluated kinetic and photochemical data for atmospheric chemistry: Volume II – gas phase reactions of organic species, Atmos. Chem. Phys., 6, 3625–4055, <https://doi.org/10.5194/acp-6-3625-2006>, 2006.

IUPAC: Task Group on Atmospheric Chemical Kinetic Data Evaluation, [online] Available from: <http://iupac.pole-ether.fr/>, last access: August 2018.
